# Supplementary material for: Repurposing propofol for breast cancer therapy through promoting apoptosis and arresting cell cycle
Source: PubMed Central journal article supplement — Oncol Rep. 2024 Sep 27;52(5):155. doi: 10.3892/or.2024.8814 (PMC11465104; doi:10.3892/or.2024.8814), 2024-09-27

Figure S1. Cell viability of BeWo, Hep-G2, HeLa, MKN-45, Ishikawa treated with varying concentrations of propofol for 3 days. Statistical analysis was performed using two-way ANOVA with Tukey's post hoc test. Data are presented as the mean  $\pm$  SD (n=3). \*\*\*\*P<0.0001.

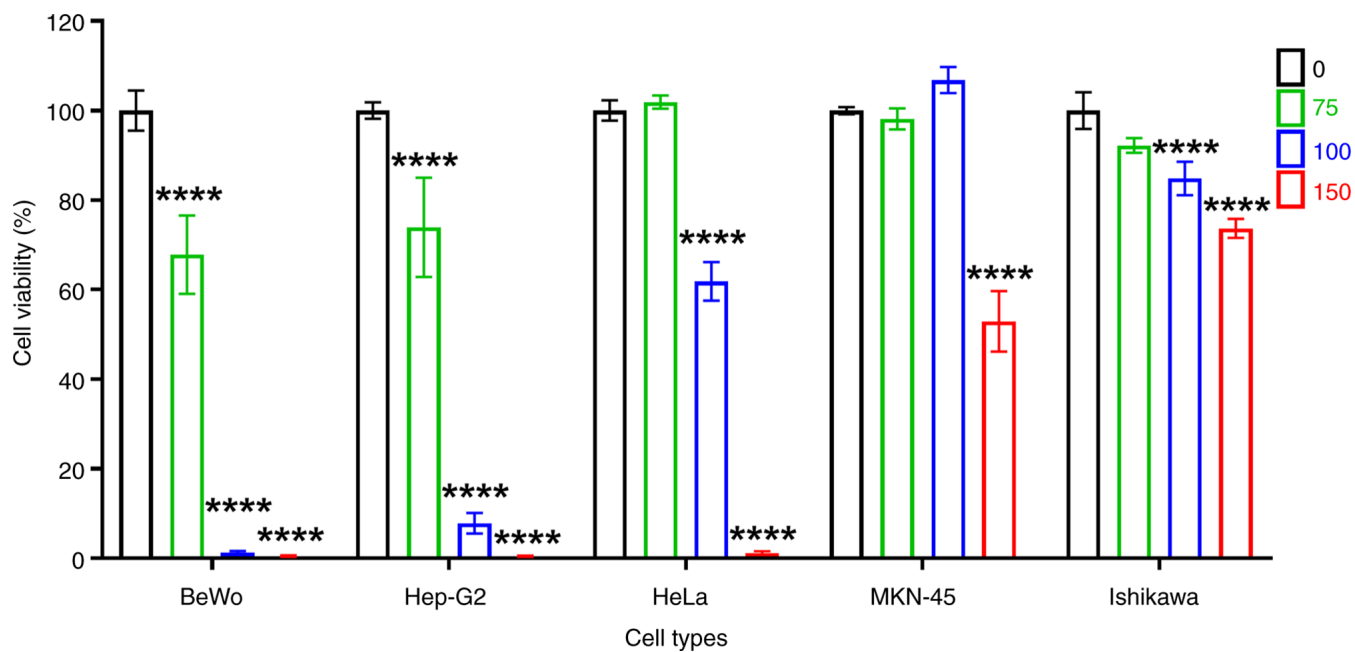

Figure S2. Cell viability of 4T1 cells following 12 h treatment with 100  $\mu\text{g/ml}$  propofol. Statistical analysis was performed using the Student's t-test. Data are presented as the mean  $\pm$  SD (n=3). \*\*\*\*P<0.0001.

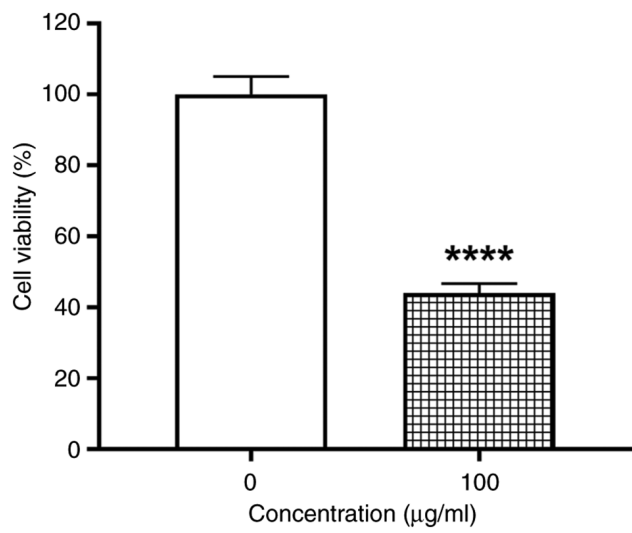

Figure S3. The changes in mice body weight during propofol treatment (n=6). Ctrl, control; ns, no significance.

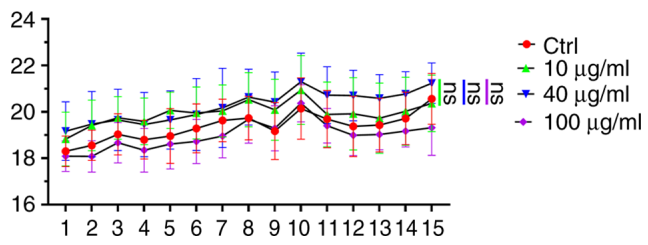

Figure S4. Hematoxylin and eosin staining of major organs after different treatments. Scale bar, 100  $\mu$ m.

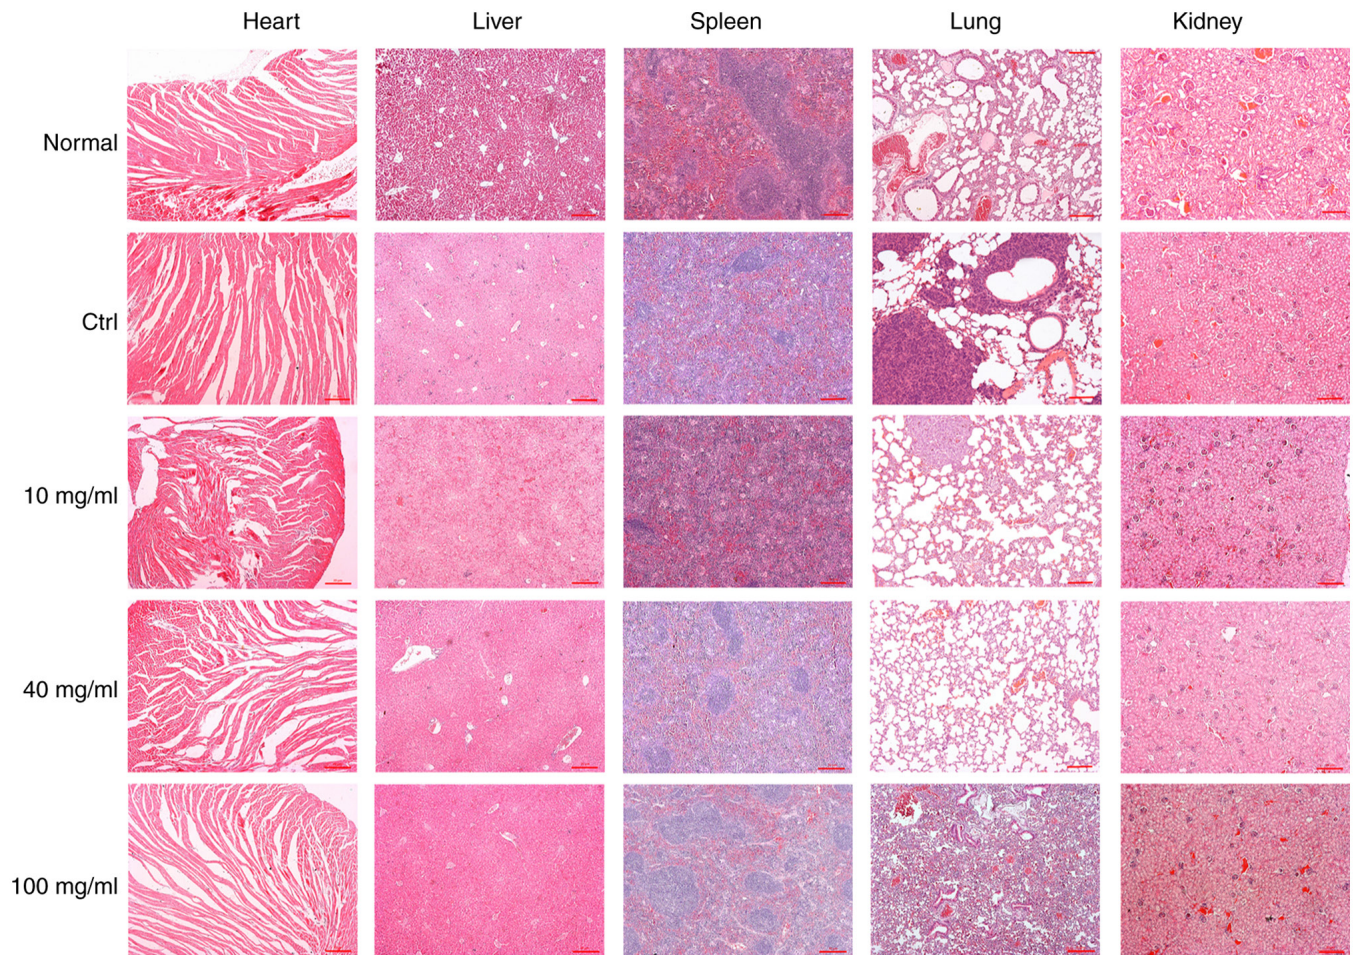

Supplement: Supplementary_Data1.pdf [file Supplementary_Data1.pdf]
