# Supplementary material for: Repurposing propofol for breast cancer therapy through promoting apoptosis and arresting cell cycle
Source: PubMed Central journal article supplement — Oncol Rep. 2024 Sep 27;52(5):155. doi: 10.3892/or.2024.8814 (PMC11465104; doi:10.3892/or.2024.8814), 2024-09-27
Supplement: Supplementary_Data2.pdf [file Supplementary_Data2.pdf]

Table SI. List of reverse transcription-quantitative PCR primer sequences.

| Gene names           | Primer sequences (5'-3')                             |
|----------------------|------------------------------------------------------|
| Mouse CDC6           | F: AGGAGCCAGACAGTCCTCAA<br>R: GGGTCAAAAGCAGCAAAGAG   |
| Mouse $\beta$ -actin | F: GGGACCTGACTGACTACCTC<br>R: TCATACTCCTGCTTGCTGAT   |
| Mouse CCNE2          | F: GCATTCTGACCTGGAACCAC<br>R: AAAAAGTCTTGGGCAAGGTAAA |

CDC6, cell division cycle 6; CCNE2, cyclin E2; F, forward; R, reverse.
